# Supplementary material for: Antitumor Effects of Ral-GTPases Downregulation in Glioblastoma
Source: MDPI journal article supplement (doi:10.3390/ijms23158199), 2022-07-25
Supplement: s1 [file s1]

Archive with 1 entries (1 files):
- ijms-1817779-supplementary new.pdf
